# Supplementary material for: Performance Comparison of Two Gene Set Analysis Methods for Genome-wide Association Study Results: GSA-SNP vs i-GSEA4GWAS
Source: PubMed Central journal article supplement — Genomics Inform. 2012 Jun 30;10(2):123–7. doi: 10.5808/GI.2012.10.2.123 (PMC3480679; doi:10.5808/gi.2012.10.2.123), 2012-06-30
Supplement: gni-10-123-s001.pdf [file gni-10-123-s001.pdf]

**SUPPLEMENTARY INFORMATION**

**Performance Comparison of Two Gene Set Analysis Methods for Genome-wide Association Study Results: GSA-SNP vs i-GSEA4GWAS**

**Ji-sun Kwon<sup>1</sup>, Jihye Kim<sup>1</sup>, Dougu Nam<sup>2</sup>, Sangsoo Kim<sup>1\*</sup>**

**<sup>1</sup>Department of Bioinformatics and Life Science, Soongsil University, Seoul 156-743, Korea,**

**<sup>2</sup>School of Nano-Bioscience and Chemical Engineering, Ulsan National Institute of Science and Technology, Ulsan 689-798, Korea**

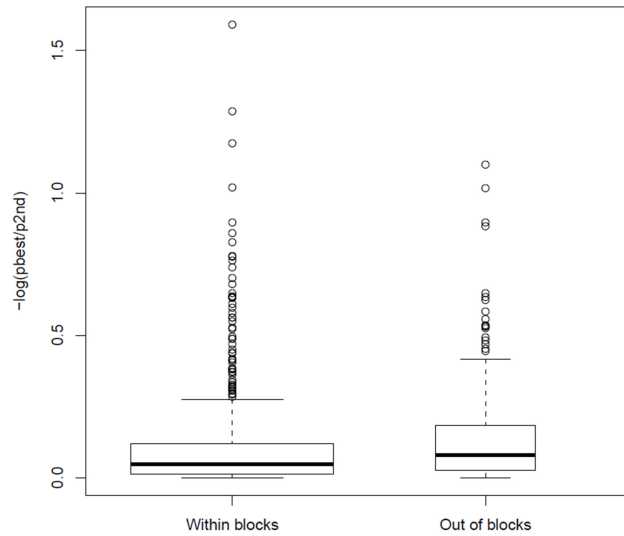

**Supplementary Fig. 1.** Distributions of the p-value difference. The ratios of the best and the second-best p-values were  $-\log$ -transformed, and their distribution was represented by a box plot. The left plot includes 586 genes on chromosome 5 for which the best single nucleotide polymorphism (SNP) was located within a haplotype block, while the right plot represents 146 genes on chromosome 5 for which the best SNP could not be located within a haplotype block. The difference between these two distributions was significant ( $p = 0.01329$ ). Haplotype blocks were calculated with PLINK.

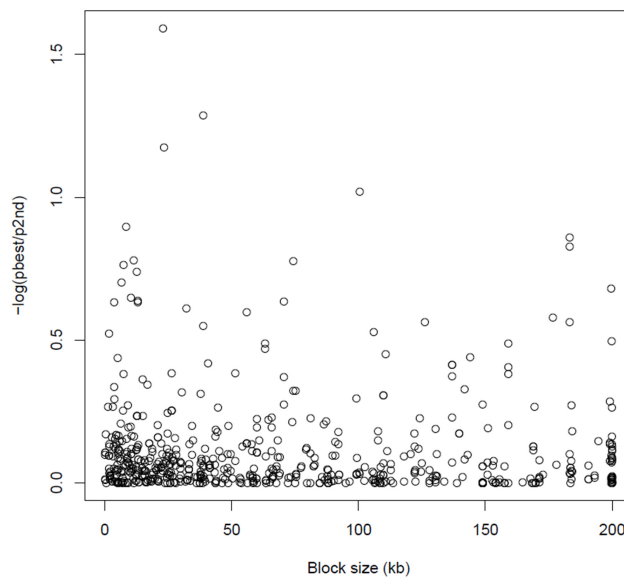

**Supplementary Fig. 2.** Relationship between haplotype block size and the p-value difference. The ratios of the best and the second-best p-values were  $-\log$ -transformed and plotted against the size of the haplotype block for which the best single nucleotide polymorphism was located; 586 genes on chromosome 5 were plotted. Haplotype blocks were calculated with PLINK.

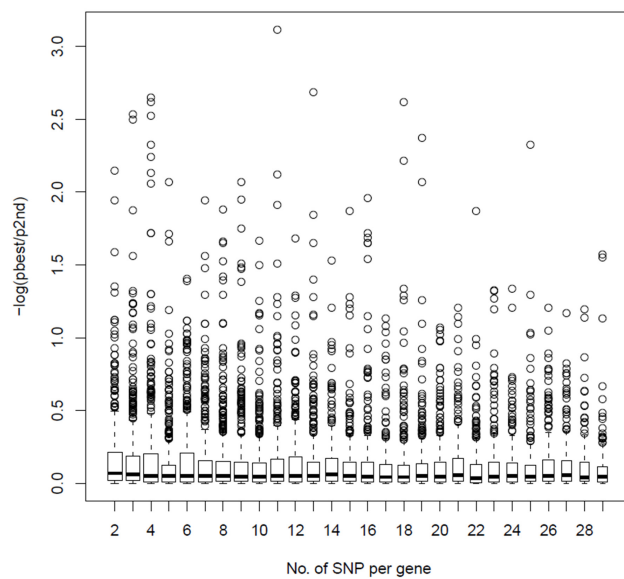

**Supplementary Fig. 3.** Distribution of the p-value difference by the number of single nucleotide polymorphisms (SNPs) per gene. The ratios of the best and the second-best p-values were  $-\log$ -transformed, and their distribution was represented by a box plot. For a gene, the number of SNPs located inside or within 20 kb of the gene boundary was counted.
